# Supplementary material
Source: PubMed Central journal article supplement (PMC7861124)
Supplement: NIHMS1662128-supplement-Supplementary_Material.pdf [file NIHMS1662128-supplement-Supplementary_Material.pdf]

## **Supplemental Appendix**

### **Supplemental Methods**

#### **Variables entered into the propensity score**

1. Age
2. Frailty score
3. Charlson Score
4. Sex
5. Rural status
6. Hyperlipidemia
7. Hypertension
8. COPD
9. Cerebrovascular disease
10. Peripheral vascular disease
11. Dementia
12. Cancer
13. Dialysis
14. CCS class
15. Smoking history
16. NY Heart Association
17. Income Quintile
18. Creatinine level
19. BMI
20. History of MI
21. Recent MI history
22. Extent of CAD
23. LV Function
24. Year of procedure (sensitivity analysis)

## Logistic Regression Outputs

| Variable             | Level of CLASS Variable 1 for Variable | DF | Estimate | Standard Error | Wald Chi-Square | Pr > Chi-Square | Estimation Type |
|----------------------|----------------------------------------|----|----------|----------------|-----------------|-----------------|-----------------|
| Intercept            |                                        | 1  | -0.6093  | 0.2303         | 7.0014          | 0.0081          | MLE             |
| age                  |                                        | 1  | 0.0215   | 0.00210        | 104.5244        | <.0001          | MLE             |
| Frailty_score        |                                        | 1  | 0.0126   | 0.00631        | 4.0065          | 0.0453          | MLE             |
| charl                |                                        | 1  | -0.0785  | 0.0161         | 23.6739         | <.0001          | MLE             |
| sex                  | F                                      | 1  | 0.1210   | 0.0226         | 28.5666         | <.0001          | MLE             |
| rural                | Y                                      | 1  | -0.0454  | 0.0288         | 2.4866          | 0.1148          | MLE             |
| hyperlipidemia       | 1                                      | 1  | 0.0628   | 0.0192         | 10.7024         | 0.0011          | MLE             |
| hypertension         | 1                                      | 1  | 0.00552  | 0.0258         | 0.0458          | 0.8305          | MLE             |
| copd                 | 1                                      | 1  | 0.1090   | 0.0246         | 19.5766         | <.0001          | MLE             |
| cvd                  | 1                                      | 1  | 0.1514   | 0.0404         | 14.0072         | 0.0002          | MLE             |
| pvd                  | 1                                      | 1  | 0.0753   | 0.0463         | 2.6518          | 0.1034          | MLE             |
| dementia             | 1                                      | 1  | 0.2492   | 0.0721         | 11.9274         | 0.0006          | MLE             |
| cancer               | 1                                      | 1  | 0.2101   | 0.0370         | 32.1559         | <.0001          | MLE             |
| dialysis             | 1                                      | 1  | 0.2036   | 0.0645         | 9.9793          | 0.0016          | MLE             |
| Cath_CcsAcsClass_cre | 0                                      | 1  | 0.0977   | 0.0614         | 2.5322          | 0.1115          | MLE             |
| Cath_CcsAcsClass_cre | 1                                      | 1  | 0.0794   | 0.0675         | 1.3840          | 0.2394          | MLE             |
| Cath_CcsAcsClass_cre | 2                                      | 1  | 0.1413   | 0.0535         | 6.9774          | 0.0083          | MLE             |
| Cath_CcsAcsClass_cre | 3                                      | 1  | 0.1583   | 0.0580         | 7.4582          | 0.0063          | MLE             |
| Cath_CcsAcsClass_cre | 4                                      | 1  | 0.0451   | 0.1050         | 0.1843          | 0.6677          | MLE             |
| Cath_CcsAcsClass_cre | 5                                      | 1  | 0.1636   | 0.0767         | 4.5530          | 0.0329          | MLE             |
| Cath_CcsAcsClass_cre | 6                                      | 1  | -0.1828  | 0.0596         | 9.4044          | 0.0022          | MLE             |
| Cath_CcsAcsClass_cre | 7                                      | 1  | -0.0438  | 0.0666         | 0.4334          | 0.5103          | MLE             |
| Cath_HistoryOfSmokin | 1                                      | 1  | -0.0151  | 0.0450         | 0.1120          | 0.7378          | MLE             |
| Cath_HistoryOfSmokin | 2                                      | 1  | -0.0309  | 0.0384         | 0.6465          | 0.4214          | MLE             |
| Cath_HistoryOfSmokin | 3                                      | 1  | 0.0691   | 0.0356         | 3.7660          | 0.0523          | MLE             |
| Cath_NYHeartAssociat | 1                                      | 1  | -0.0852  | 0.0408         | 4.3642          | 0.0367          | MLE             |
| Cath_NYHeartAssociat | 2                                      | 1  | -0.0243  | 0.0551         | 0.1942          | 0.6594          | MLE             |
| Cath_NYHeartAssociat | 3                                      | 1  | -0.0613  | 0.0701         | 0.7658          | 0.3815          | MLE             |
| Cath_NYHeartAssociat | 4                                      | 1  | 0.0799   | 0.1011         | 0.6247          | 0.4293          | MLE             |
| incquint             | 1                                      | 1  | 0.1207   | 0.0662         | 3.3263          | 0.0682          | MLE             |
| incquint             | 2                                      | 1  | 0.0560   | 0.0661         | 0.7188          | 0.3965          | MLE             |
| incquint             | 3                                      | 1  | 0.0594   | 0.0663         | 0.8021          | 0.3705          | MLE             |
| incquint             | 4                                      | 1  | -0.1056  | 0.0679         | 2.4163          | 0.1201          | MLE             |
| incquint             | 5                                      | 1  | -0.0263  | 0.0690         | 0.1450          | 0.7034          | MLE             |
| CCN_creatiniegrp     | 0-120                                  | 1  | -0.1460  | 0.0398         | 13.4285         | 0.0002          | MLE             |
| CCN_creatiniegrp     | 121-180                                | 1  | 0.0885   | 0.0535         | 2.7371          | 0.0980          | MLE             |
| CCN_creatiniegrp     | 181+                                   | 1  | -0.0328  | 0.0818         | 0.1611          | 0.6881          | MLE             |
| CCN_BMIgrp           | 0-25                                   | 1  | 0.0471   | 0.0404         | 1.3635          | 0.2429          | MLE             |
| CCN_BMIgrp           | 26-30                                  | 1  | 0.0712   | 0.0340         | 4.3880          | 0.0362          | MLE             |
| CCN_BMIgrp           | 31plus                                 | 1  | 0.0233   | 0.0346         | 0.4515          | 0.5016          | MLE             |
| Cath_HistoryOfMiCD   | N                                      | 1  | -0.1173  | 0.0228         | 26.5624         | <.0001          | MLE             |

|                   |              |   |          |        |          |        |     |
|-------------------|--------------|---|----------|--------|----------|--------|-----|
| Cath_RecentMiCD   | N            | 1 | -0.0268  | 0.0295 | 0.8279   | 0.3629 | MLE |
| disease_stat      | Double<br>VD | 1 | 0.5685   | 0.0218 | 678.3283 | <.0001 | MLE |
| Cath_LvFunctionCD | 20% -<br>34% | 1 | -0.00491 | 0.0796 | 0.0038   | 0.9509 | MLE |
| Cath_LvFunctionCD | 35% -<br>49% | 1 | -0.1585  | 0.0612 | 6.7027   | 0.0096 | MLE |
| Cath_LvFunctionCD | <20%         | 1 | 0.3362   | 0.1545 | 4.7348   | 0.0296 | MLE |
| Cath_LvFunctionCD | >=50%        | 1 | -0.1178  | 0.0528 | 4.9697   | 0.0258 | MLE |

## **Supplemental Results**

In a sensitivity analysis with dialysis patients excluded, long-term mortality was higher in the PCI group with a HR 1.44 (95%CI; 1.32-1.58, see Supplemental Figure 9) in 4130 well-matched pairs. We excluded patients that underwent PCI with bare metal stents and performed PS matching to form 3457 well matched pairs and found higher long-term mortality in the PCI group with a HR 1.41 (95%CI: 1.27-1.56, see Supplemental Figure 10). Finally, in an analysis where we matched patients by year of procedure in addition to all the other covariates in the propensity score, we found that the primary analysis was robust and again, long-term mortality was higher with PCI compared to CABG with HR 1.35 (95%CI: 1.23-1.47, see Supplemental Figure 11) in 3762 matched-pairs.

## Supplemental Tables

**Supplemental Table 1.** Hazard ratios and 95% confidence intervals (95%CI) before and after propensity score matching

|                          | Before Propensity Score Matching | After Propensity Score Matching |
|--------------------------|----------------------------------|---------------------------------|
| All cause mortality      | 1.66 (95%CI:1.54-1.78)           | 1.39 (95%CI:1.28-1.51)          |
| MACCE                    | 2.26 (95%CI:2.14-2.38)           | 1.99 (95%CI:1.86-2.12)          |
| Acute MI                 | 2.58 (95%CI:2.33-2.86)           | 2.32 (95%CI:2.04-2.64)          |
| Repeat Revascularization | 3.77 (95%CI:3.45-4.13)           | 3.65 (95%CI:3.24-4.11)          |
| Stroke                   | 0.83 (95%CI:0.69-0.99)           | 0.87 (95%CI:0.71-1.08)          |

**Supplemental Table 2. Details of first repeat revascularization event**

|                            | Need for repeat revascularization |              |
|----------------------------|-----------------------------------|--------------|
|                            | PCI (n=1,149)                     | CABG (n=358) |
| Repeat CABG                | 231 (20.1%)                       | 8 (2.2%)     |
| Repeat PCI                 | 918 (79.9%)                       | 350 (97.8%)  |
| PCI for instent restenosis | 69 (6.1%)                         | N/A          |
| PCI of previous CABG graft | N/A                               | 57 (16.2%)   |

**Supplemental Figures**

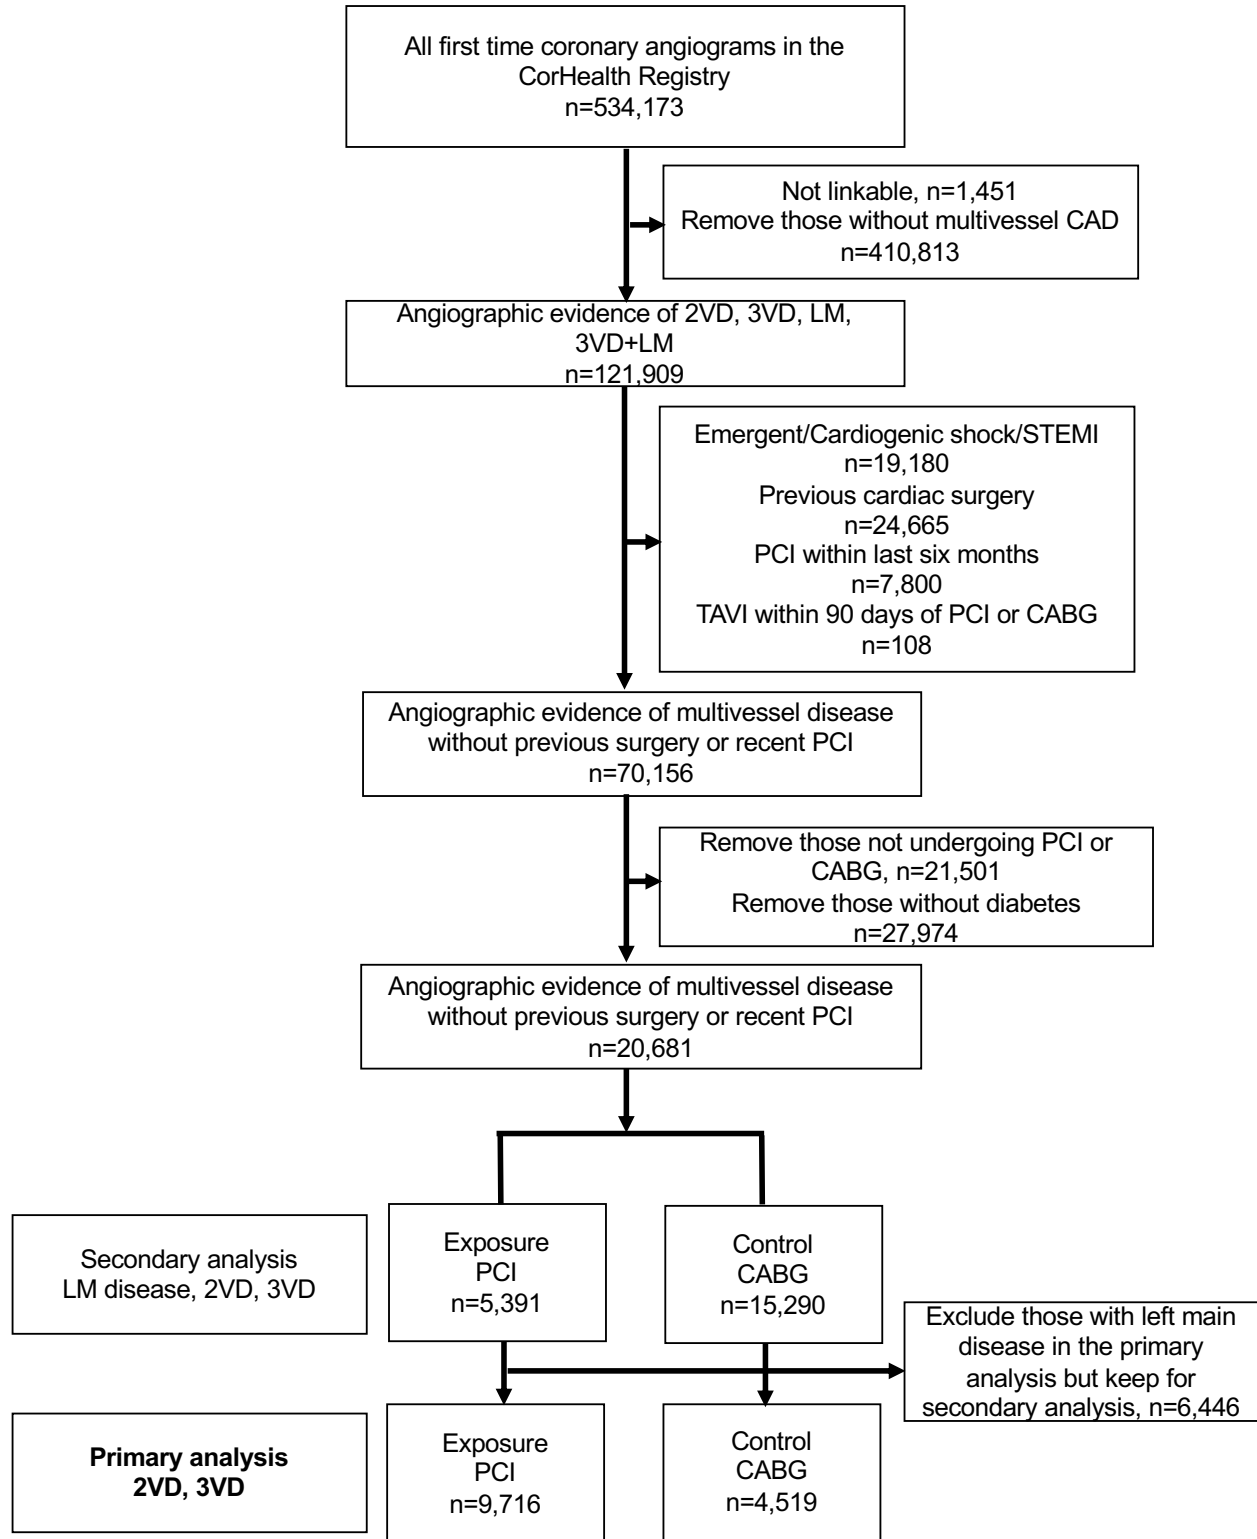

**Supplemental Figure 1.** Patient flow diagram for primary and secondary analysis.

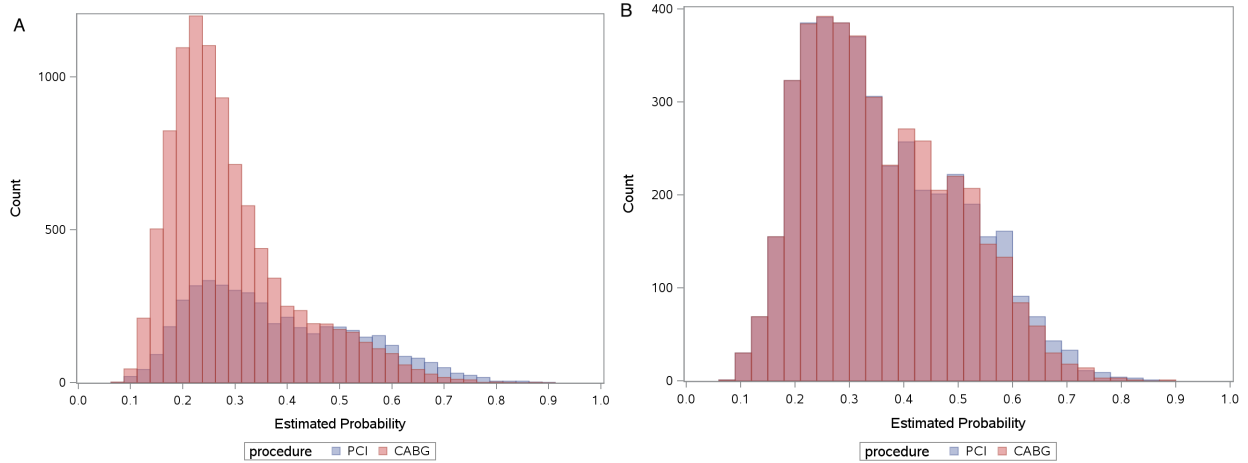

**Supplemental Figure 2.** A. Distribution of propensity scores before matching. B. Distribution of propensity scores after matching.



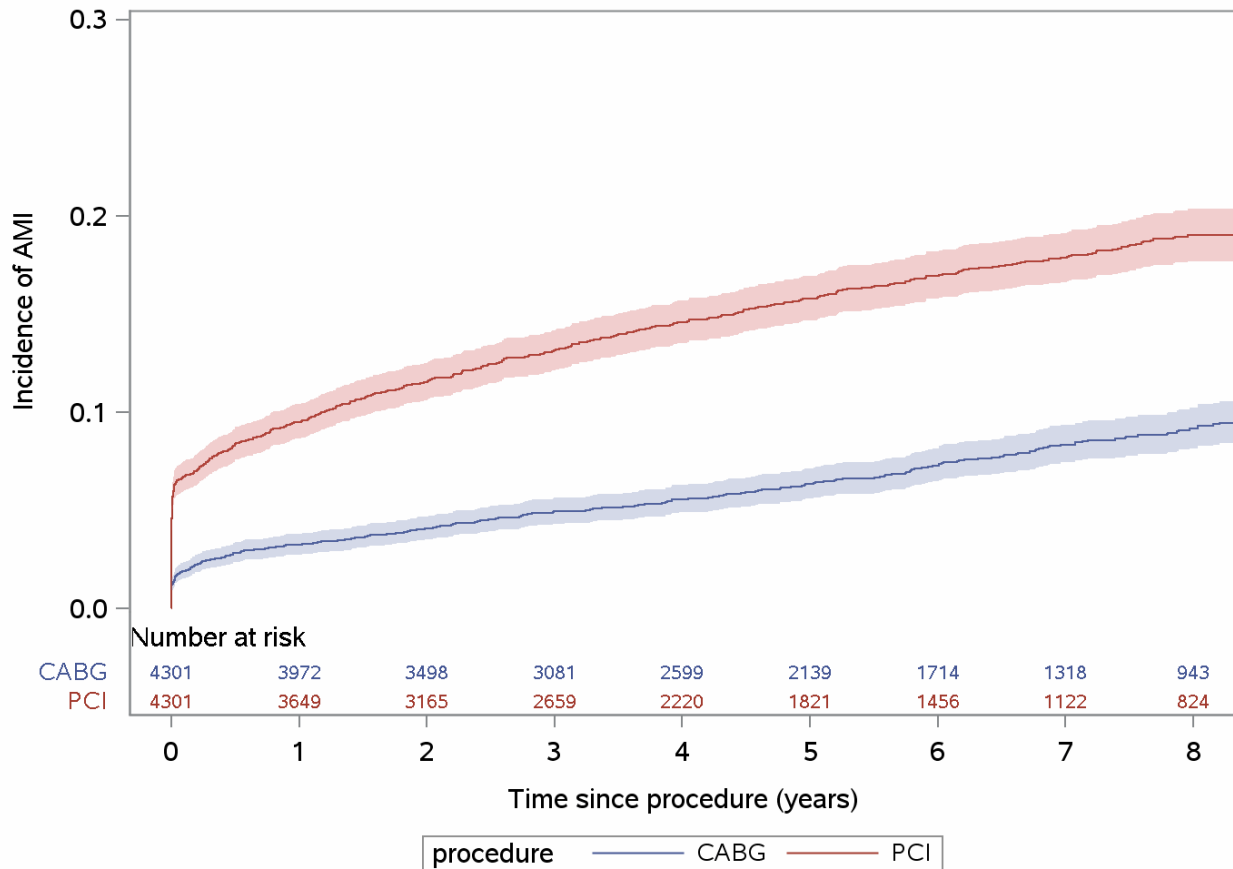

**Supplemental Figure 3.** Cumulative incidence curves for 8-year acute myocardial infarction (AMI) for the propensity-matched percutaneous coronary intervention (PCI) versus coronary artery bypass grafting (CABG) in patients with diabetes and multivessel coronary artery disease after adjusting for death as a competing risk. The shaded region around the curve represents the 95% confidence interval.

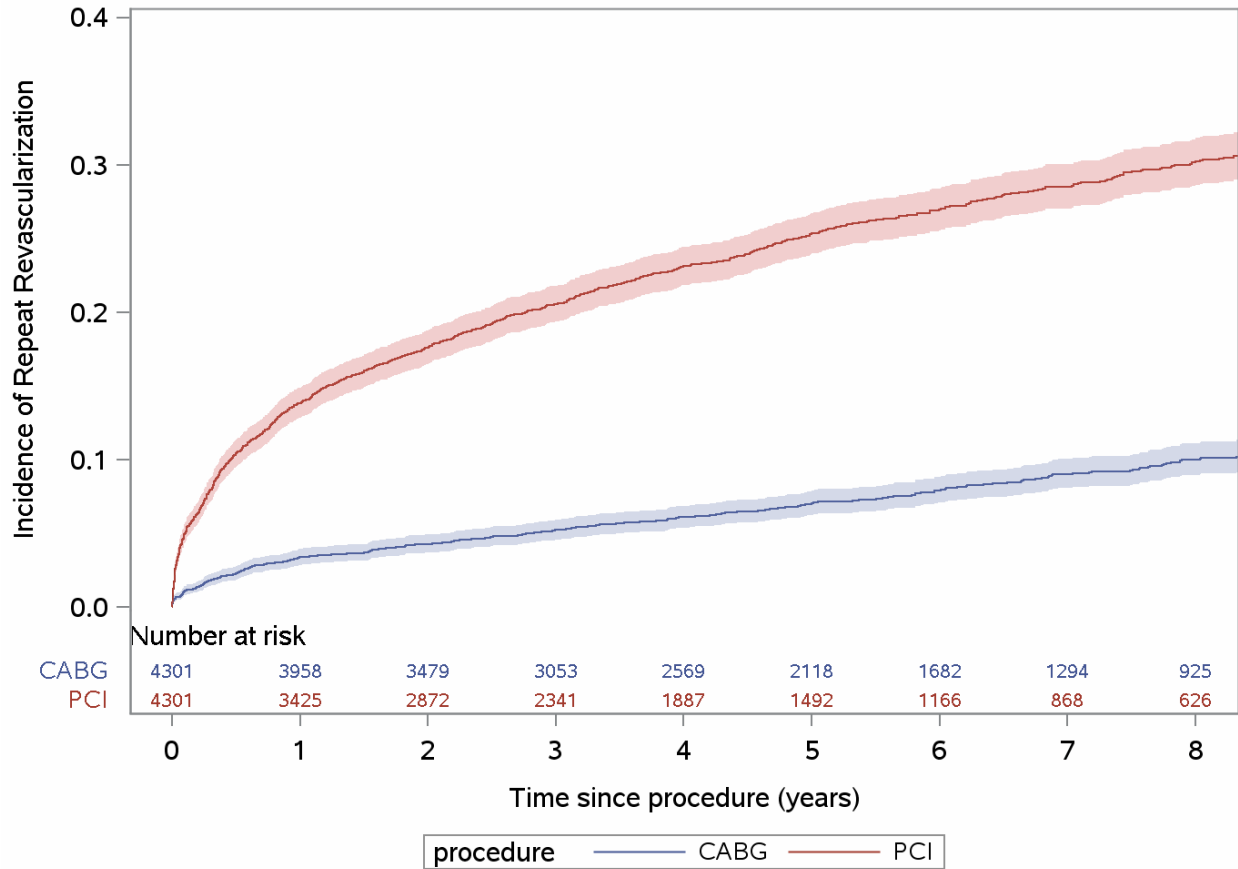

**Supplemental Figure 4.** Cumulative incidence curves for 8-year repeat revascularization for the propensity-matched percutaneous coronary intervention (PCI) versus coronary artery bypass grafting (CABG) in patients with diabetes and multivessel coronary artery disease after adjusting for death as a competing risk. The shaded region around the curve represents the 95% confidence interval.

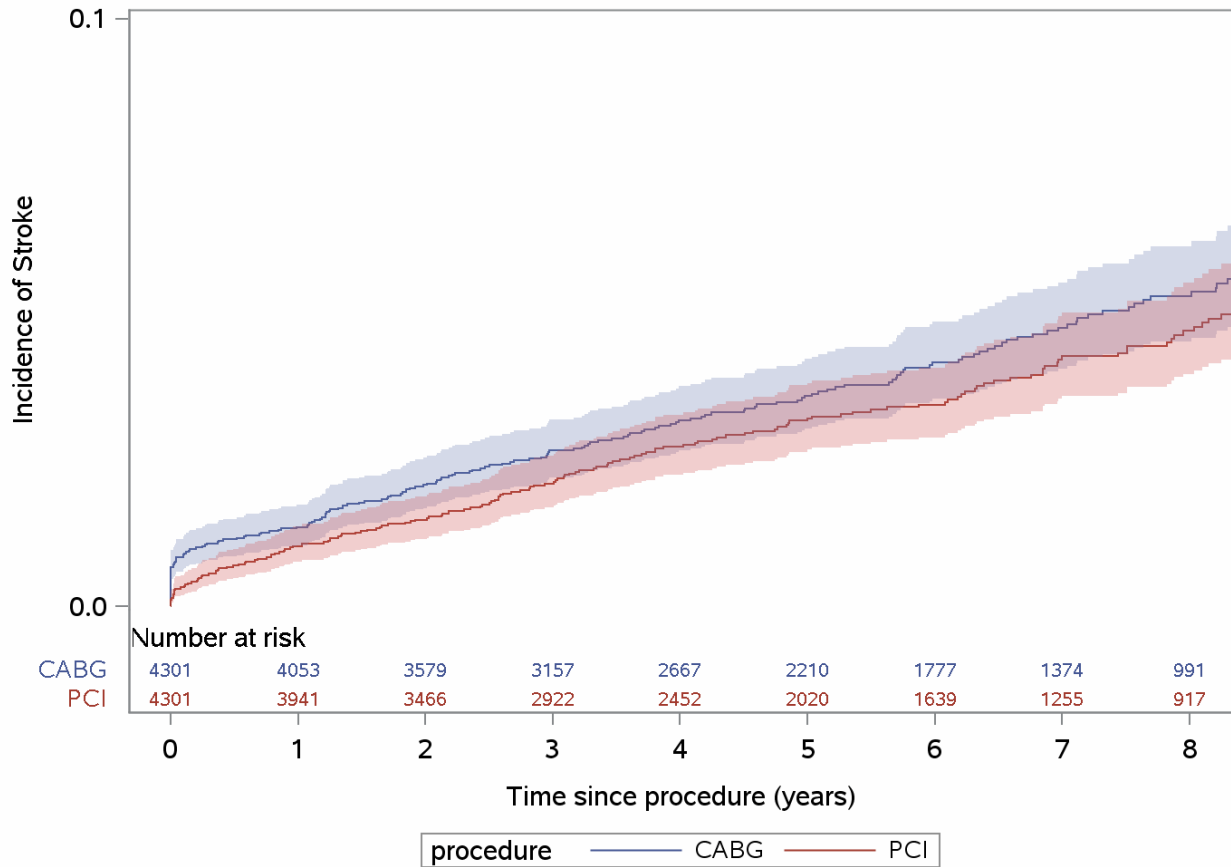

**Supplemental Figure 5.** Cumulative incidence curves for 8-year stroke for the propensity-matched percutaneous coronary intervention (PCI) versus coronary artery bypass grafting (CABG) in patients with diabetes and multivessel coronary artery disease after adjusting for death as a competing risk. The shaded region around the curve represents the 95% confidence interval.

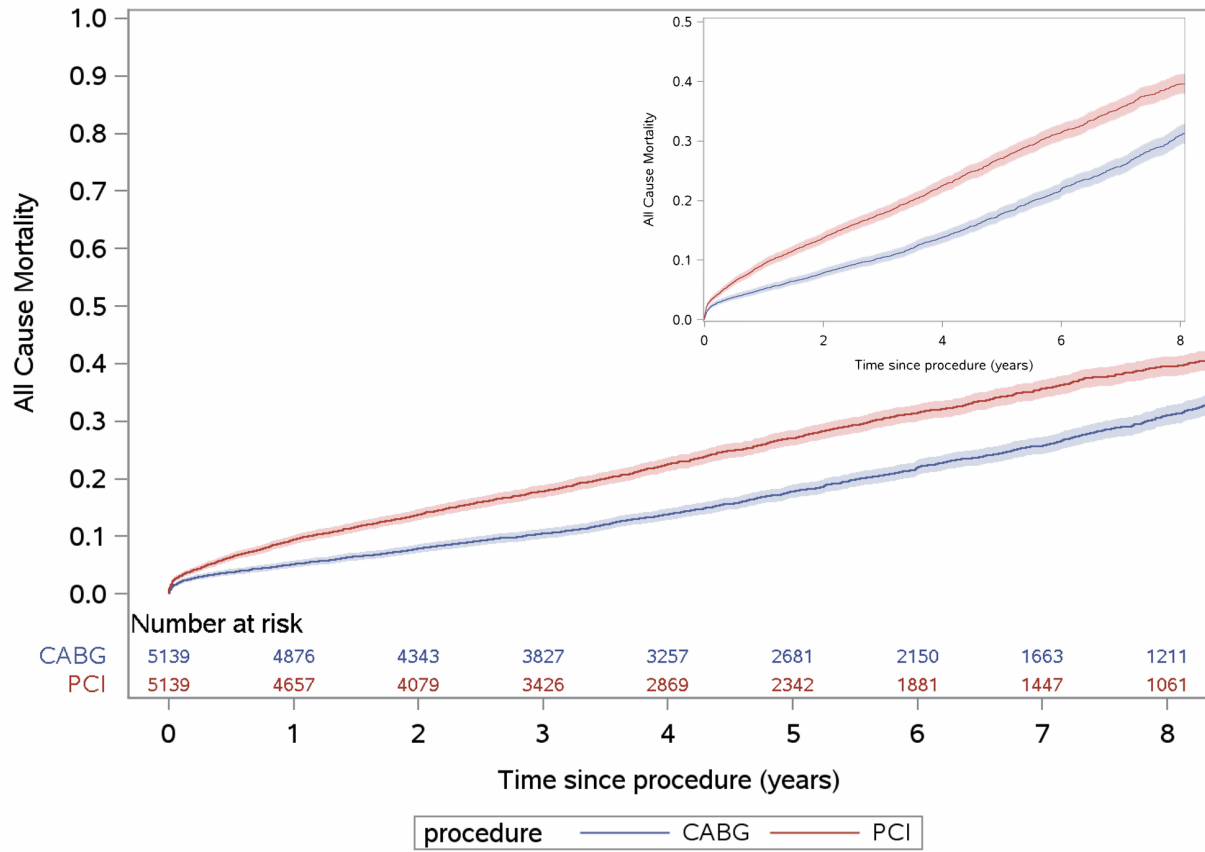

**Supplemental Figure 6.** Cumulative incidence curves for 8-year all-cause mortality for the propensity-matched percutaneous coronary intervention (PCI) versus coronary artery bypass grafting (CABG) in patients with diabetes and left main, three vessel and two vessel coronary artery disease. The shaded region around the curve represents the 95% confidence interval.

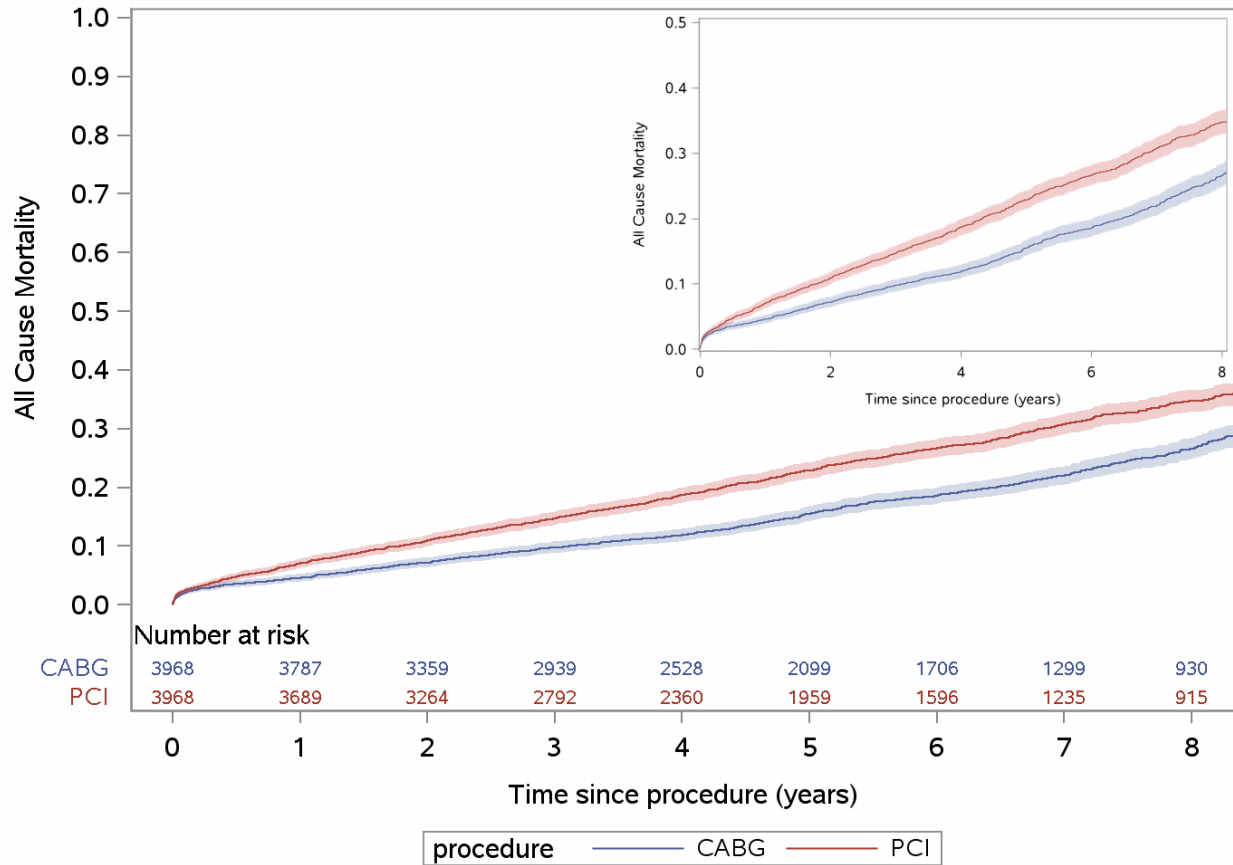

**Supplemental Figure 7.** Cumulative incidence curves for 8-year all-cause mortality for the propensity-matched percutaneous coronary intervention (PCI) versus coronary artery bypass grafting (CABG) in patients with diabetes and multivessel coronary artery disease after removal of patients undergoing PCI that had a cardiac surgical consult (i.e potential surgical turndown). The shaded region around the curve represents the 95% confidence interval.

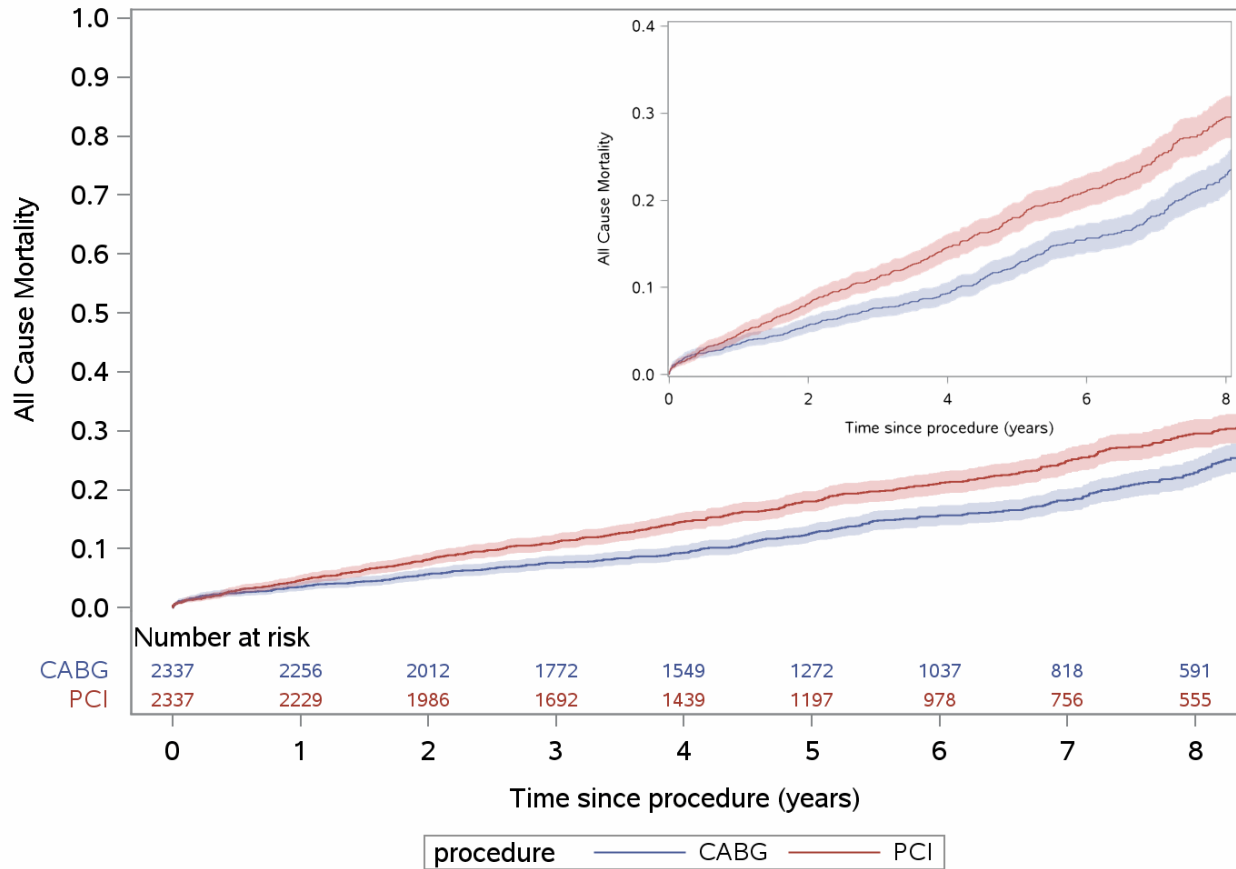

**Supplemental Figure 8.** Cumulative incidence curves for 8-year all-cause mortality for the propensity-matched percutaneous coronary intervention (PCI) versus coronary artery bypass grafting (CABG) in patients with diabetes and multivessel coronary artery disease after removal of patients undergoing PCI with an admitting diagnosis of acute coronary syndrome. The shaded region around the curve represents the 95% confidence interval.

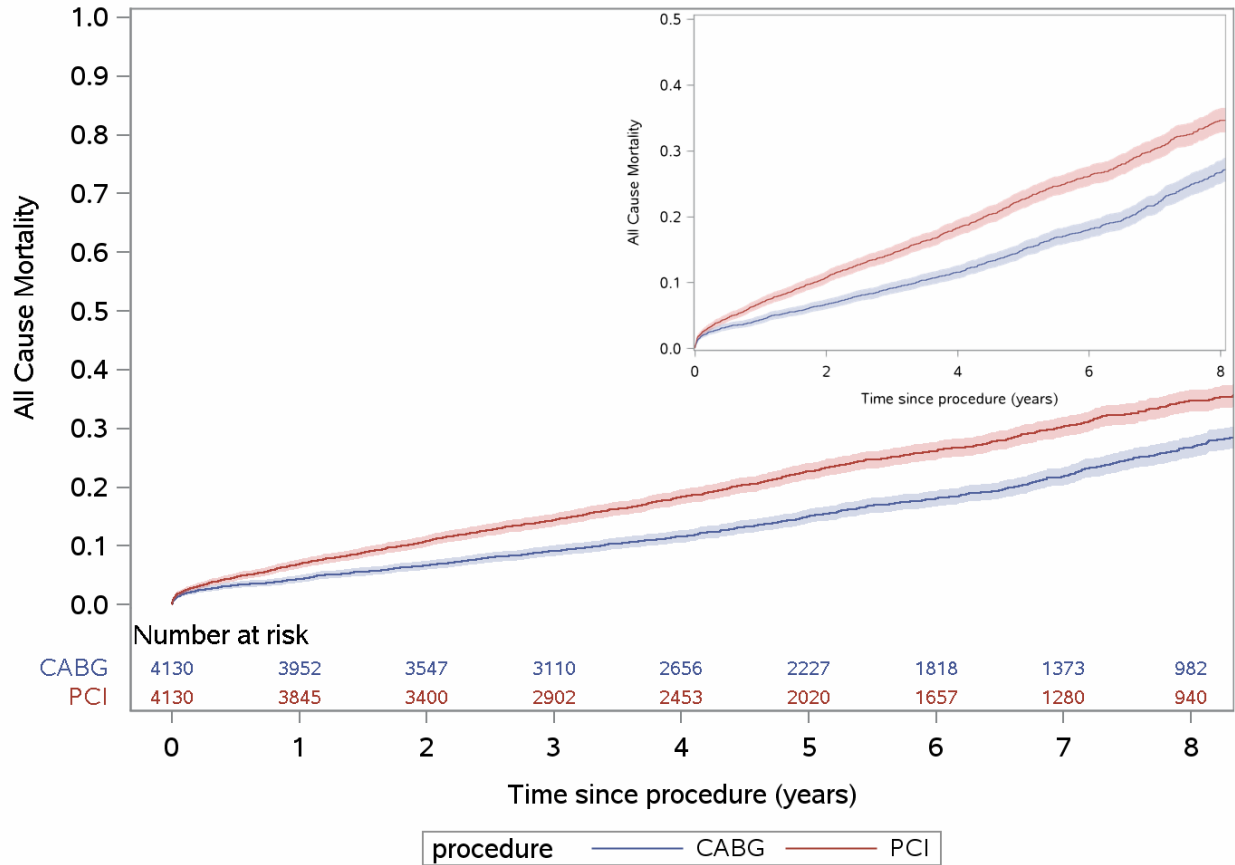

**Supplemental Figure 9.** Cumulative incidence curves for 8-year all-cause mortality for the propensity-matched percutaneous coronary intervention (PCI) versus coronary artery bypass grafting (CABG) in patients with diabetes and multivessel coronary artery disease after removal of patients with a history of dialysis. The shaded region around the curve represents the 95% confidence interval.

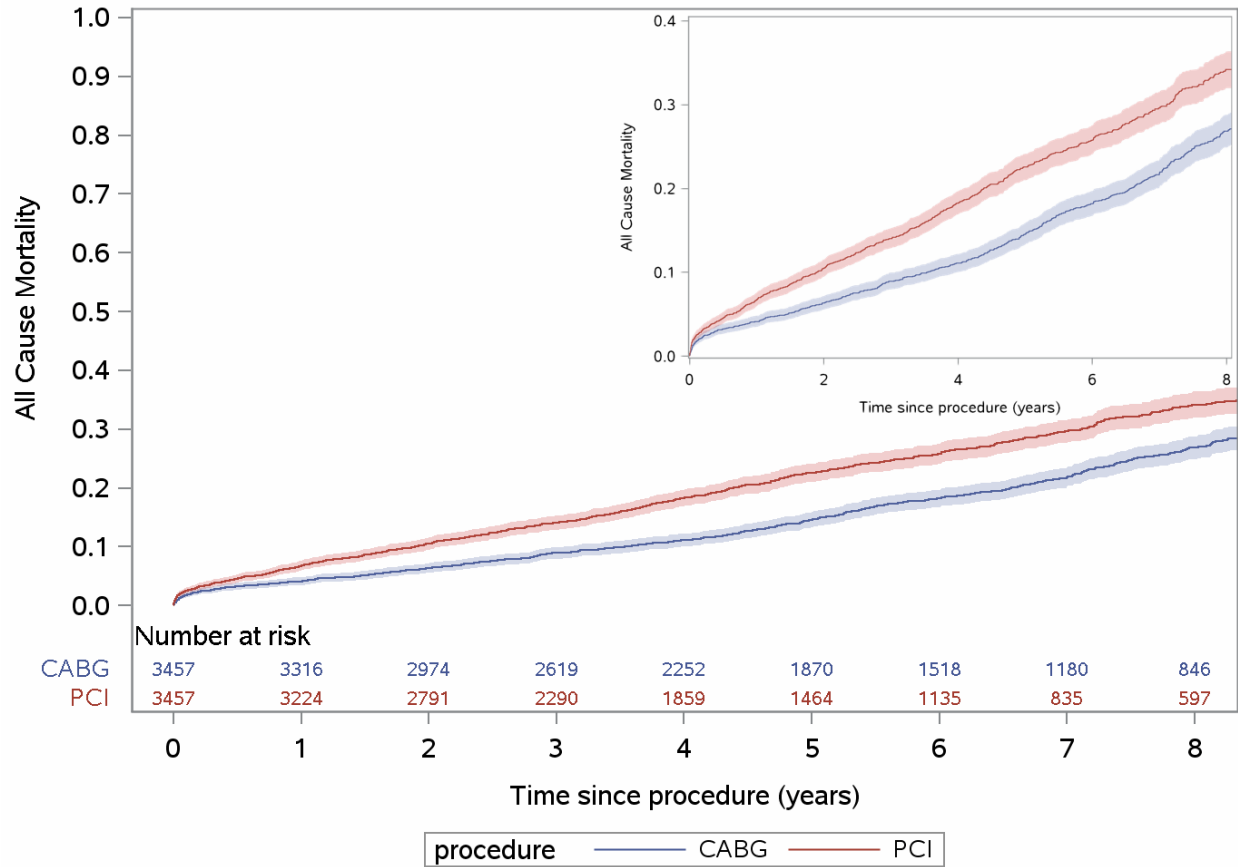

**Supplemental Figure 10.** Cumulative incidence curves for 8-year all-cause mortality for the propensity-matched percutaneous coronary intervention (PCI) versus coronary artery bypass grafting (CABG) in patients with diabetes and multivessel coronary artery disease after removal of PCI patients that received a bare metal stent. The shaded region around the curve represents the 95% confidence interval.



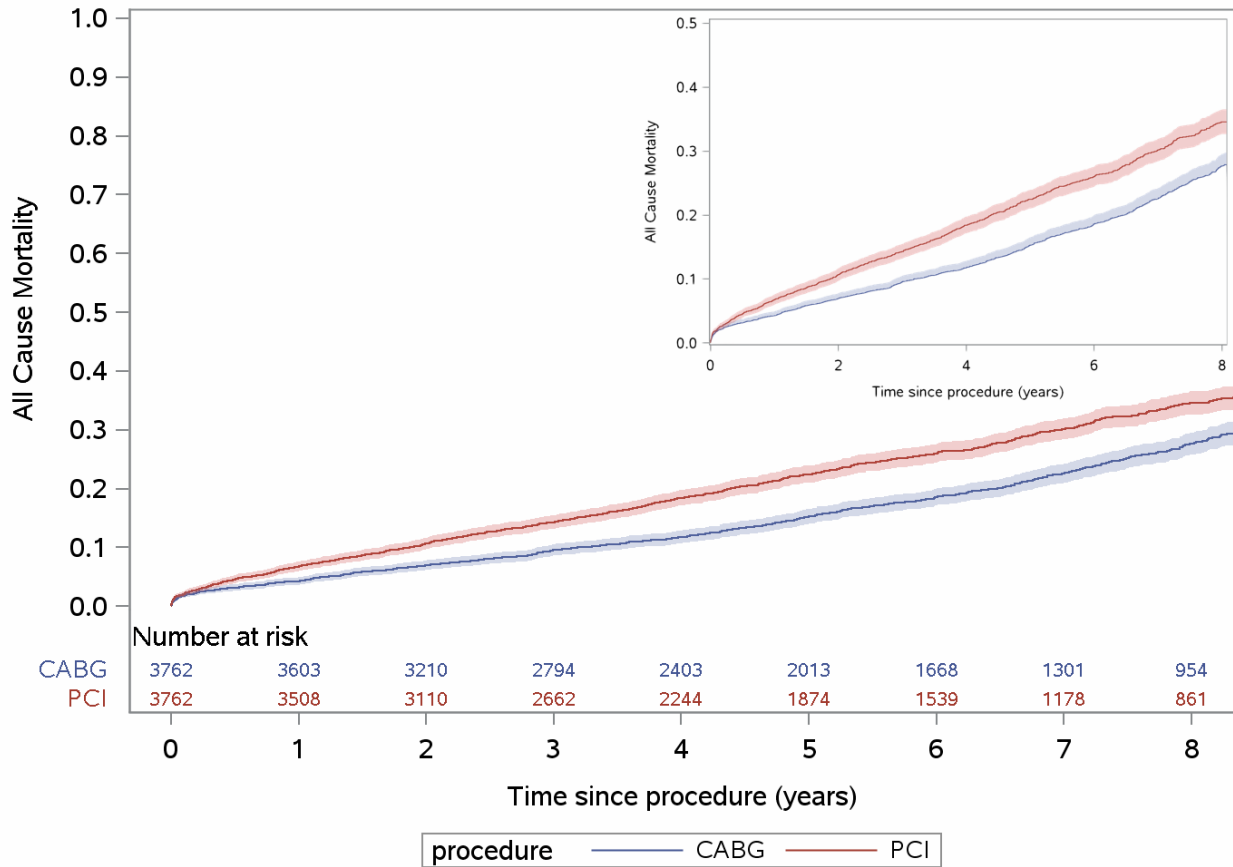

**Supplemental Figure 11.** Cumulative incidence curves for 8-year freedom from all-cause mortality for the propensity-matched on 23 covariates and an exact match on year of procedure for percutaneous coronary intervention (PCI) versus coronary artery bypass grafting (CABG) in patients with diabetes and multivessel coronary artery disease. The shaded region around the curve represents the 95% confidence interval.
